# Supplementary material for: An Integrative Approach for Modeling and Simulation of Heterocyst Pattern Formation in Cyanobacteria Filaments
Source: PubMed Central journal article supplement (PMC4376521; doi:10.1371/journal.pcbi.1004129), 2015-03-27
Supplement: pcbi.1004129.s002.pdf [file pcbi.1004129.s002.pdf]

## Text S2: Turing linear stability analysis

Alejandro Torres-Sánchez<sup>1,2</sup>, Jesus Gómez-Gardeñes<sup>1,3</sup>, Fernando Falo<sup>1,3</sup>

<sup>1</sup>Departamento de Física de la Materia Condensada, Universidad de Zaragoza, Zaragoza, Spain.

<sup>2</sup> Laboratori de Càlcul Numèric, Universitat Politècnica de Catalunya-Barcelonatech, Barcelona, Spain.

<sup>3</sup>Instituto de Biocomputación y Física de Sistemas Complejos (BIFI), Universidad de Zaragoza, Zaragoza, Spain.

Here we discuss the Turing stability analysis of our system [51, 53]. Let us first discuss the general theory. We consider a chain composed of  $n$ -dimensional dynamical systems, each one  $i = 1, \dots, n$  characterized by  $\dot{\mathbf{q}}_i = \mathbf{f}(\mathbf{q}_i)$ . If we add diffusion along the chain, the behavior of cell  $i$  is characterized by:

$$\frac{d\mathbf{q}_i}{d\tau} = \mathbf{f}(\mathbf{q}_i) + \tilde{D}(\mathbf{q}_{i+1} + \mathbf{q}_{i-1} - 2\mathbf{q}_i), \quad (1)$$

where  $\tilde{D}$  is the *diffusion tensor*. Now we consider a (stable) fixed point,  $\mathbf{q}_0$ , of the dynamical system, i.e.  $\mathbf{f}(\mathbf{q}_0) = \mathbf{0}$ . It also constitutes a fixed point for the entire chain since diffusion terms cancel ( $\mathbf{q}_i = \mathbf{q}_j$  for all  $i$  and  $j$ ). We want to analyze the effect of a small perturbation,  $\Delta$ , around the steady state of the chain. Introducing the variables

$$\mathbf{q}_i = \mathbf{q}_0 + \Delta_i, \quad (2)$$

into Equation 1, and expanding up to first order in  $\Delta$  one gets:

$$\frac{d\Delta_i}{d\tau} = \nabla \mathbf{f}(\mathbf{q}_0) \cdot \Delta_i + \tilde{D}(\Delta_{i+1} + \Delta_{i-1} - 2\Delta_i), \quad (3)$$

where  $\nabla \mathbf{f}(\mathbf{q}_0)$  is the Jacobian matrix of the field evaluated in the point  $\mathbf{q}_0$ . Furthermore, we can decompose the perturbation in terms of plane waves:

$$\begin{aligned} \Delta_i(\tau) &= \sum_k \Delta_{i,k}, \\ \Delta_{i,k}(\tau) &= \mathbf{A} e^{\omega_k \tau} \cos(ki). \end{aligned} \quad (4)$$

The admissible values of the wavevector  $k$  depend on the length of the chain and on the boundary conditions. For instance,  $k = n\pi/L$  with  $n = 1, 2, 3, \dots, L$  for Von Neumann (zero flux) boundary conditions. Introducing 4 into 3 we find:

$$\omega_k \mathbf{A} = \nabla \mathbf{f}(\mathbf{q}_0) \mathbf{A} + 2\tilde{D} \mathbf{A} (\cos k - 1), \quad (5)$$

which has nontrivial solutions if

$$\det(\nabla \mathbf{f}(\mathbf{q}_0) + 2\tilde{D}(\cos k - 1) - \omega_k) = 0. \quad (6)$$

Therefore, the  $k$  mode is related to some possible frequencies  $\omega_k$ . If those frequencies satisfy  $\text{Re}(\omega_k) < 0$ , it is expected that the perturbation  $\Delta$  will be damped (negative exponential) and the

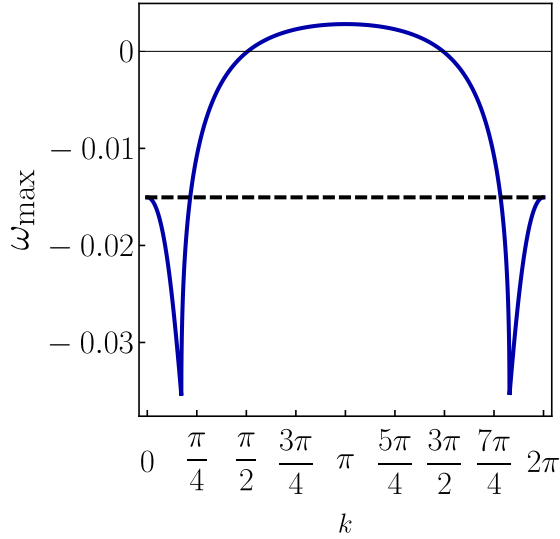

FIGURE 1: Results for  $\omega_{\max}$  extracted from Equation 6 for the cyanobacterial system with  $D_s = 0.1$  and  $D_n = 0.2$  (Blue). The black dashed line indicates the value at equilibrium in the absence of diffusion

system will recover its initial equilibrium. Nevertheless, if  $\text{Re}(\omega_k) > 0$  perturbations will be amplified (positive exponential) and thus it is expected that structures of wavelength  $2\pi/k$  will develop. The important value that determines if the system is stable to perturbations of some wavevector  $k$  is the largest real part of the  $\omega_k$  from 6.

We can now turn to our cyanobacteria chain characterized by Eq. (16) of the main text. We analyze the effect of perturbations around the vegetative-like state for  $D_s = 0.1$  and  $D_n = 0.2$  (Figure 1). We find that the system is unstable against perturbations of intermediate wavevectors, with an upper bound (representing a minimum length at which patterns can be formed) and a lower bound (maximum length). The value of the minimum length (measured in cell number)  $l_{\min} \approx 8/7 > 1$  so that a single cell is unable to differentiate.
